# Supplementary material
Source: publisher site journal article supplement (https://cdn.jamanetwork.com/ama/content_public/journal/jama/938235/jpc190007supp2_prod.pdf)
Supplement: Supplementary file 1 [file jpc190007supp2_prod.pdf]

|                         |                                  |
|-------------------------|----------------------------------|
| <b>FORM-STAT-04A-01</b> | <b>Statistical Analysis Plan</b> |
| Version 1.0             |                                  |
|                         |                                  |

1  
2  
3  
4  
5  
6  
7  
8  
9  
10  
11  
12  
13  
14  
15  
16  
17  
18  
19  
20  
21  
22  
23  
24  
25  
26  
27  
28  
29  
30  
31  
32

**FAB Trial - Fluoxetine for Autistic Behaviours**

**Multi-site randomised controlled trial of Fluoxetine versus placebo for the treatment of restricted, repetitive and stereotyped behaviours in children and adolescents with autism**

**Document Version History**

| Version Date | Version   | Author           | Change Description | Reason/Comment  |
|--------------|-----------|------------------|--------------------|-----------------|
| 25-Sep-17    | Version 1 | Francesca Orsini | Initial release.   | Not applicable. |

TABLE OF CONTENTS

33  
34  
35  
36

37

38 **LIST OF ABBREVIATIONS..... 3**

39 **1. STUDY OBJECTIVES..... 4**

40 1.1. PRIMARY OBJECTIVE ..... 4

41 1.2. SECONDARY OBJECTIVES ..... 4

42 **2. BACKGROUND/INTRODUCTION ..... 4**

43 2.1. STUDY DESIGN ..... 4

44 2.2. TREATMENT GROUPS..... 4

45 2.3. STUDY POPULATION ..... 5

46 2.4. INTERVENTION ..... 5

47 2.5. SAMPLE SIZE ..... 5

48 2.6. STUDY PROCEDURE ..... 6

49 2.7. PATIENT COMPLETION AND WITHDRAWAL..... 6

50 **3. OUTCOME VARIABLES ..... 6**

51 3.1. PRIMARY OUTCOME ..... 6

52 3.2. SECONDARY OUTCOMES ..... 7

53 3.3. OTHER PARAMETERS ..... 7

54 **4. STATISTICAL METHODOLOGY ..... 8**

55 4.1. GENERAL METHODOLOGY ..... 8

56 4.2. ANALYSIS OF THE PRIMARY OUTCOME ..... 9

57 4.3. ANALYSIS OF THE SECONDARY OUTCOMES ..... 9

58 4.4. SUBGROUP ANALYSIS..... 10

59 4.5. ANALYSIS OF THE SAFETY DATA ..... 10

60 4.6. ANALYSIS OF THE COMPLIANCE DATA ..... 10

61

## LIST OF ABBREVIATIONS

62

63

64

|    |            |                                                                                    |
|----|------------|------------------------------------------------------------------------------------|
| 65 | AE         | Adverse Event                                                                      |
| 66 | ASD        | Autism spectrum disorder                                                           |
| 67 | CEBU       | Clinical epidemiology and biostatistics unit                                       |
| 68 | CI         | Confidence interval                                                                |
| 69 | CRF        | Case Report Form                                                                   |
| 70 | CYBOCS-PDD | Children's Yale-Brown Obsessive Compulsion Scale—Pervasive Developmental Disorders |
| 71 | DSM-IV TR  | Diagnostic and Statistical Manual                                                  |
| 72 | GCP        | Good Clinical Practice                                                             |
| 73 | ITT        | Intent-To-Treat                                                                    |
| 74 | MAOI       | Monoamine oxidase inhibitor                                                        |
| 75 | SAE        | Serious Adverse Event                                                              |
| 76 | SD         | Standard Deviation                                                                 |
| 77 | SSRI       | Selective Serotonin Reuptake Inhibitors                                            |

78

79

80

81 **1. STUDY OBJECTIVES**

82

83 **1.1. PRIMARY OBJECTIVE**

84 To determine the efficacy of fluoxetine, compared to placebo, for reducing the frequency and  
85 severity of restricted, repetitive and stereotypic behaviours in children and adolescents with  
86 autism.

87

88

89 **1.2. SECONDARY OBJECTIVES**

90 - To determine the frequency and type of adverse events reported for low dose fluoxetine  
91 compared to placebo, in children and adolescents with autism.

92

93

94 **2. BACKGROUND/INTRODUCTION**

95

96 **2.1. STUDY DESIGN**

97 This study is a randomised double-blind placebo-controlled trial with a parallel group design.

98 Treatment for both the active and control groups will be of **16 weeks duration**. Participants will then  
99 be **weaned off the study medication over 4 weeks and followed up for a further 2 weeks**.

100

101

102

102 **2.2. TREATMENT GROUPS**

103

104

105

Participants randomised to the active group will receive fluoxetine (fluoxetine hydrochloride  
dissolved in methocel base). Participants in the control group will receive placebo syrup (methocel  
base only), which is indistinguishable from the active treatment.

106

107

108

The study will include **146** children and adolescents who will be randomised between the fluoxetine  
and placebo groups. Block randomisation will be used, and **stratified by site, age and IQ**. There are  
three sites:

109

110

111

- Royal Children's Hospital (Victoria)
- Children's Hospital at Westmead (New South Wales)
- State Child Development Centre (Western Australia).

112

Age will be stratified into:

113

114

- 7.5 to <12 years
- 12 to 18 years.

115

IQ will be stratified into:

116

117

- $IQ \geq 70$  (average/borderline range)
- $IQ < 70$  (intellectual disability range).

118

119

120

121

122

123

124

125

126

127

128

129

Parents/guardians, participants, and study investigators will remain blinded to treatment allocation  
until the database has been locked for analysis and the analysis plan is finalised. The randomisation  
schedule will be known only to the independent statistician in the clinical epidemiology and  
biostatistics unit (CEBU) at the Royal Children's Hospital who generated the randomisation list and  
the clinical trials pharmacist at each site. In an emergency, a participant can be unblinded by a study  
doctor contacting the clinical trials pharmacist at that site.

130 **2.3. STUDY POPULATION**

131 Children and adolescents aged between 7.5 and less than 18 years with an autism spectrum disorder  
132 (ASD), and associated restricted, repetitive and stereotyped behaviours causing functional  
133 impairment.

134

135 **Inclusion criteria**

- 136 - Males and females aged 7.5 to 18 years.
- 137 - A diagnosis of an ASD based on the Autism Diagnostic Interview (ADI-R), and Diagnostic and  
138 Statistical Manual (DSM-IV TR) criteria for Autistic Disorder (as above), Asperger's Disorder and  
139 Pervasive Developmental Disorder – Not Otherwise Specified.
- 140 - Total score of  $\geq 6$  on the Children's Yale-Brown Obsessive Compulsive Scale – modified for  
141 pervasive developmental disorders
- 142 - Will be able to comply with the assessments and procedures required for the trial.

143

144 **Exclusion criteria**

- 145 - A known DSM-IV diagnosis of Rett's Disorder, Childhood Disintegrative Disorder, Schizophrenia  
146 or Major Depression.
- 147 - Patients currently prescribed or who have received in the six week period prior to study entry:
  - 148 o Fluoxetine and other Selective Serotonin Reuptake Inhibitors (SSRI)
  - 149 o Other psychotropic medications, including typical and atypical anti-psychotics, mood  
150 stabilisers and anxiolytics.
  - 151 o Atomoxetine
  - 152 o Monoamine oxidase inhibitor (MAOI) or pimozone
  - 153 o Antidepressants
  - 154 o Use of St John's Wort
- 155 - Co-morbid significant medical conditions (e.g. unstable seizure disorder, cardiac disease, liver  
156 failure or renal failure).
- 157 - Pregnancy –females of childbearing potential require a urine pregnancy test to exclude  
158 pregnancy.

159

160

161 **2.4. INTERVENTION**

162 For Study Medication and Dosage refer to Protocol Version 4 (24 May 2015).

163

164

165 **2.5. SAMPLE SIZE**

166 The validation of the Children's Yale-Brown Obsessive Compulsion Scale – Modified for Pervasive  
167 Developmental Disorders (CYBOCS-PDD) in 172 medication-free children with an ASD found a **mean**  
168 **total score of 14.4 with a standard deviation (SD) of 3.86**. Based on the study investigators' clinical  
169 experience in the management of children with autism, a **difference of 2** on the CYBOCS was  
170 considered to represent a clinically important improvement in repetitive behaviours. Consequently,  
171 we aimed to power our study to find an **effect size of 0.5** (corresponding to a difference of 2 on the  
172 CYBOCS based on a standard deviation of 3.8). With 80% power and two-sided alpha of 0.05 this  
173 required a sample size of 64 per treatment group. Allowing for a 15% drop-out rate, 73 participants  
174 were required per treatment group. We therefore aimed to recruit a total of **146** participants to this  
175 study.

176

177

178

179

180  
181  
182  
183

**2.6. STUDY PROCEDURE**

The table below provides an overview of the procedures for this study. For complete details on study procedures refer to Protocol Version 4.3 (24 April 2014).

| Procedure              | Initial Screening        | Testing [Pre]            | Week 1                   | Week 2                   | Week 3                   | Week 4                   | Weeks 6,8,10,12,14,16    | Testing [Post]           | Week 17-20               | Week 22                  |
|------------------------|--------------------------|--------------------------|--------------------------|--------------------------|--------------------------|--------------------------|--------------------------|--------------------------|--------------------------|--------------------------|
| Inc & Exc Criteria     | <input type="checkbox"/> |                          |                          |                          |                          |                          |                          |                          |                          |                          |
| Consent                |                          | <input type="checkbox"/> |                          |                          |                          |                          |                          |                          |                          |                          |
| Randomization          |                          | <input type="checkbox"/> |                          |                          |                          |                          |                          |                          |                          |                          |
| Trial Questionnaires   |                          | <input type="checkbox"/> |                          |                          |                          |                          |                          | <input type="checkbox"/> |                          |                          |
| IQ Testing             |                          | <input type="checkbox"/> |                          |                          |                          |                          |                          |                          |                          |                          |
| ADI-R                  |                          | <input type="checkbox"/> |                          |                          |                          |                          |                          |                          |                          |                          |
| Medication Commenced   |                          |                          | <input type="checkbox"/> |                          |                          |                          |                          |                          |                          |                          |
| Dose Adjustments       |                          |                          |                          | <input type="checkbox"/> | <input type="checkbox"/> | <input type="checkbox"/> |                          |                          |                          |                          |
| Side Effects Checklist |                          |                          |                          | <input type="checkbox"/> | <input type="checkbox"/> | <input type="checkbox"/> | <input type="checkbox"/> |                          | <input type="checkbox"/> | <input type="checkbox"/> |
| Weaning of medication  |                          |                          |                          |                          |                          |                          |                          |                          | <input type="checkbox"/> |                          |

184  
185  
186

**2.7. PATIENT COMPLETION AND WITHDRAWAL**

Subjects will be considered to have **completed the study medication upon completion of 16 weeks** of the study drug. Premature termination of the study drug will be defined as completing less than 16 weeks of treatment. Even if the study drug is terminated prior to 16 weeks, every effort will be made by the investigator to continue the follow-up of the patients in the study until study completion (week 22). A patient may withdraw (or be withdrawn) from treatment prematurely for the following reasons:

- Significant adverse events (serious adverse event form must be completed)
- Patient/caregiver decision to discontinue the treatment
- Patient lost to follow-up

Patients may also withdraw their consent to be in the study at which point they will be withdrawn from the study treatment and follow-up. They may also withdraw their consent for previously collected data being used for analysis.

The reason for withdraw from treatment and/or the study will be recorded on the patient completion/withdrawal section of the case report form (CRF). Every effort will be made to follow up patients who withdraw from treatment with drug-related adverse experiences, in order to determine the final outcome.

200  
201

**3. OUTCOME VARIABLES**

202  
203  
204  
205  
206

**3.1. PRIMARY OUTCOME**

210 *Children's Yale-Brown Obsessive Compulsion Scale – Modified for Pervasive Developmental*  
211 *Disorders (CYBOCS-PDD)* - measured at 16 weeks. The CYBOCS-PPD includes a detailed symptom  
212 checklist of possible obsessions and compulsions, which are then rated across five severity items  
213 (time spent on obsessions, interference, distress, resistance, and degree of control). The total  
214 score on the CYBOCS-PDD ranges from 0 to 20, with higher scores indicating higher severity. The  
215 CYBOCS was modified for use in children with a pervasive developmental disorder by the RUPP  
216 Autism Network. Both the CYBOCS-PDD and YBOCS (adult version) have been widely used in  
217 clinical drug trials in autism, and shown to be sensitive to change. The CYBOCS-PDD is the primary  
218 outcome measure for this trial, in line with previous trials in this field.  
219  
220

### 221 3.2. SECONDARY OUTCOMES

222 All the secondary outcomes are measured at 16 weeks.

223  
224 **Repetitive Behaviours Scale – Revised (RBS-R)**. This revised version of the scale captures the breadth  
225 of repetitive behaviours in autism. The RBS-R consists of six subscales: stereotypic behaviours  
226 (range: 0-18), self injurious behaviours (range: 0-24), compulsive behaviours (range: 0-24),  
227 ritualistic behaviours (range: 0-18), sameness behaviours (range: -33), and restricted behaviours  
228 (range: 0-12). Higher scores indicate higher severity. Recently the RBS-R was validated in both  
229 children and adults with autism.  
230

231 **Spence Children's Anxiety Scale (SCAC)**. This scale consists of a child and parent version. Each scale  
232 contains six subscales (panic/agoraphobia, social anxiety, separation anxiety, generalised anxiety,  
233 obsessions/compulsions, and fear of physical injury) and provides a total score which ranges 0-  
234 114, with higher score indicating higher severity. The validity and reliability of the Spence (child  
235 and parent versions) has been established for both anxiety-disordered and normal control  
236 populations.  
237

238 **Aberrant Behaviour Checklist (ABC) – Community Version**. The ABC assesses maladaptive behaviours  
239 in individuals with a developmental disability or intellectual impairment. The ABC items are  
240 grouped into five subscales: irritability/agitation (range: 0-45), lethargy/social withdrawal (range:  
241 0-48), stereotypic behaviour (range: 0-21), hyperactivity/non-compliance (range: 0-48) and  
242 inappropriate speech (range: 0-12). Higher scores indicate higher severity. The ABC has been  
243 widely used in clinical drug trials in autism. The factor structure of the ABC – community version  
244 has been found to be robust in an ASD sample of 275 individuals aged 3 to 21 years.  
245

246 **Clinical Global Impressions Scale (CGI) – Global Improvement and Efficacy Index**. The CGI29 is a scale  
247 widely used to assess treatment response in psychiatric conditions. It is a three-item scale: severity  
248 of illness (rated on a 7-point scale), global improvement (rated on a 7-point scale), and efficacy  
249 index (rated on a 16-point scale). The CGI has been widely used in clinical drug trials in autism, and  
250 shown to be sensitive to change.  
251

252 **Disruptiveness assessment**. This assessment will collect information in regards to Anger/Aggression,  
253 Anxiety, Sadness/Depression, Excitability/Overexcited, ADHD each of which will be coded as (0=  
254 not a problem, 1= some problem, 2= significant problem). The outcome of interest is the total  
255 score of disruptiveness which is a sum of the 5 scores (range: 0-10).  
256  
257

### 258 3.3. OTHER PARAMETERS

259

260  
261  
262  
263  
264  
265  
266  
267  
268  
269  
270  
271  
272  
273  
274

#### DEMOGRAPHY AND BASELINE

- Child age (years), weight (kg) and height (m) at baseline
- Gender
- IQ at baseline
- Primary diagnosis (Autism/Asperger's Syndrome/Autism Spectrum Disorder)
- Presence of intellectual disability (y/n)
- Level of intellectual disability (mild/moderate/severe/unknown severity)
- Communication level (Normal language for age/Impaired speech and language/No speech)
- Pre-existing medications (y/n), in particular stimulant medications such as Methylphenidate, Dexamphetamine, Concerta, Atomoxetine, Lisdexamphetamine.
- Medical history: Family history of ASD (y/n), history of seizures (y/n), presence of epilepsy (y/n), frequency of seizures (~1/week, ~1/month, ~1/year, < 1year)

#### COMPLIANCE

An estimate of compliance to treatment will be calculated for each participant using this formula:

$$\frac{(\text{total amount of doses that should have been taken} - \text{number of missed doses})}{\text{total amount of doses that should have been taken}} * 100$$

275  
276  
277  
278  
279  
280  
281  
282

#### SAFETY

- Non-serious adverse event
- Serious adverse event

283  
284

## 4. STATISTICAL METHODOLOGY

285  
286  
287  
288  
289  
290  
291

### 4.1. GENERAL METHODOLOGY

Data analysis for this study will be performed by Ms Francesca Orsini, an experienced biostatistician who works in CEBU at the Murdoch Children's Research Institute (MCRI). The details of the randomisation will be unblinded only once the database has been locked and the Statistical Analysis Plan has been finalised and approved by the trial team.

292  
293  
294  
295  
296  
297  
298

#### 4.1.1. Population for analysis

Analysis will be performed on an intention-to-treat (ITT) basis. Children will be compared according to the group to which they were randomly allocated, regardless of treatment compliance, crossover to other treatments or withdrawal from the study. This approach preserves the prognostic balance in the study arms achieved by randomisation.

299  
300  
301  
302  
303  
304

#### 4.1.2. Baseline data

Baseline characteristics will be presented separately for children in the active and placebo groups using means and standard deviations (SD) for continuous data (or medians and inter-quartile ranges for non-normal data) and proportions for categorical data.

305  
306  
307  
308

#### 4.1.3. Distributional assumptions

- *Censored normal distribution outcomes* - Tobit regression models will be used to confirm the sensitivity of linear regression to a non-normal distribution for outcomes with a censored normal distribution (CGI Severity, CGI Improvement, CGI Efficacy, ABI V).



- 309 - *Non-normally distributed outcomes* - The outcome will be log-transformed and linear  
310 regression model will be run on the logarithmic scale to confirm the sensitivity of linear  
311 regression to a non-normal distribution.  
312

#### 314 4.1.4. Handling of missing data

315 The primary analysis will be a complete case analysis. Should the proportion of missing data on the  
316 primary outcome be more than 5%, the frequency and patterns of missing data will be examined  
317 and, if deemed appropriate, a sensitivity analyses will be performed to compare the results of  
318 analyses restricted to children with complete data and analyses where those with missing data are  
319 considered using multiple imputation. Multiple imputation models will be conducted including all  
320 outcome variables in a single imputation model and 50 completed data sets will be imputed by  
321 chained equations including all the children initially randomised. The primary outcome and all the  
322 secondary ones listed in section 3.2 will be in the imputation model as well as the demography and  
323 baseline variable listed in section 3.3, using linear regression for continuous variables, logistic  
324 regression for binary variables, ordered logistic regression for ordinal variables, and multinomial  
325 logistic regression for nominal variables.  
326

#### 328 4.1.5. Protocol violations and patient withdrawals

329 All deviations / violations to the protocol will be summarized separately for children in the active  
330 and placebo groups using absolute and relative frequencies. Analogously, all the reason for early  
331 withdrawal of the treatment/study will be summarized using absolute and relative frequencies by  
332 arm.  
333

### 335 4.2. ANALYSIS OF THE PRIMARY OUTCOME

336 The total score on the CYBOCS-PDD at 16 weeks will be presented separately for children in the  
337 active and placebo groups using means and standard deviations (SD). Comparisons between  
338 treatments arms will be made using linear regression, with results presented as a mean difference  
339 and its 95% confidence interval (CI), adjusted for the stratification factors used during  
340 randomization, i.e. site, age at baseline and IQ.  
341

342 As sensitivity analysis, the same linear regression model will then be re-run adjusting also for the  
343 following potentially confounding factors:

- 344 - CYBOCS-PDD total score at baseline
  - 345 - Presence of intellectual disability
  - 346 - Communication level (verbal versus non-verbal)
  - 347 - Frequency of seizure (~ 1 /week, ~ 1 /month, ~ 1 /year, < 1 year)
  - 348 - On stimulant medications at baseline (Methylphenidate, Dexamphetamine, Concerta,  
349 Atomoxetine or Lisdexamphetamine)
  - 350 - Any baseline and demographic variables where an imbalance between groups is found
- 351

### 353 4.3. ANALYSIS OF THE SECONDARY OUTCOMES

354  
355 All secondary outcomes (in particular RBS-R: subscales and total score; SCAC: total score; ABC:  
356 subscales; CGI: subscales; Disruptiveness Assessment: total score) will be presented separately for  
357 children in the active and placebo groups using means and SDs. Comparisons between treatments  
358 arms will be made using linear regression, with results presented as a mean difference and its 95%

359 CI, adjusted for the stratification factors used during randomization, i.e. site, age at baseline and  
360 IQ.

361

362 As sensitivity analysis, the same linear regression models will then be re-run adjusting also for the  
363 following potentially confounding factors:

- 364 - correspondent outcome score at baseline
- 365 - Presence of intellectual disability
- 366 - Communication level (verbal versus non-verbal)
- 367 - Frequency of seizure (~ 1 /week, ~ 1 /month, ~ 1 /year, < 1 year)
- 368 - On stimulant medications at baseline (Methylphenidate, Dexamphetamine, Concerta,  
369 Atomoxetine or Lisdexamphetamine)
- 370 - Any baseline and demographic variables where an imbalance between groups is found

371

372

#### 373 4.4. SUBGROUP ANALYSIS

374 The score of the Spence Anxiety scales described in this document might be affected by the  
375 participant communication level, e.g some subscales might be unanswerable by non-verbal  
376 children, therefore left blank. For such scales, we will conduct the analysis described in section 4.3  
377 separately for verbal (subgroup 1) and non-verbal children (subgroup 2).

378

379

#### 380 4.5. ANALYSIS OF THE SAFETY DATA

381 All adverse events (AEs) will be summarized separately for children in the active and placebo groups  
382 using absolute and relative frequencies.

383

384

#### 385 4.6. ANALYSIS OF THE COMPLIANCE DATA

386 Compliance to treatment will be summarized separately for children in the active and placebo  
387 groups using absolute and relative frequencies.

388

389

390

391

392

393

394

395

396  
397  
398  
399  
400  
401  
402  
403  
404  
405  
406  
407  
408  
409

**SIGNATURES PAGE**

Signature of Principal Investigator:  
Print Name



Date 26-09-2017

---

Prof Dinah Reddihough

Signature of Statistician performing the analysis:  
Print Name



Date 25-09-2017

---

Francesca Orsini

Signature of Trial Statistician:  
Print Name



Date 26-09-2017

---

Katherine Lee

410  
411  
412  
413
